# Supplementary material
Source: PubMed Central journal article supplement (PMC4609247)
Supplement: NIHMS702152-supplement-1.pdf [file NIHMS702152-supplement-1.pdf]

**Supplemental Table 1. Oligonucleotide primers used for qRT-PCR analysis**

| Gene symbol        | Primer direction | Primer sequence                 |
|--------------------|------------------|---------------------------------|
| MCM2               | Forward          | 5' - CCAGGCCTCTCTTGATGTCT - 3'  |
|                    | Reverse          | 5' - TAGCCTCTCCAAGGATCAGC - 3'  |
| MCM3               | Forward          | 5' - CCAGTGTTCGGGCTGTA ACT - 3' |
|                    | Reverse          | 5' - GGCCACCTACATTGCAGAAG - 3'  |
| MCM4               | Forward          | 5' - CGAATAGGCACAGCTCGATA - 3'  |
|                    | Reverse          | 5' - GGCAGACACCACACAGTT - 3'    |
| MCM5               | Forward          | 5' - AGGGATCTTACCAGGTGTG - 3'   |
|                    | Reverse          | 5' - GACATCCAGGTCATGCTCAA - 3'  |
| MCM6               | Forward          | 5' - TCTACTATGCGCTGGCAAT - 3'   |
|                    | Reverse          | 5' - TTGTCAGCTCCCATCATGTC - 3'  |
| MCM7               | Forward          | 5' - GGTCAGTTCTCCACTCACGG - 3'  |
|                    | Reverse          | 5' - CATACTTGATCGACTGGCG - 3'   |
| MCM10              | Forward          | 5' - GCGGTCAGCAGAGACAGATT - 3'  |
|                    | Reverse          | 5' - CGGCCAAGATTCTACATTGC - 3'  |
| ACAT2              | Forward          | 5' - TGCCATTTTGTGGCTACATT - 3'  |
|                    | Reverse          | 5' - GGTGAGATGCCACTGACTGA - 3'  |
| HMGC51             | Forward          | 5' - TGGCAGGGAGTCTTGGTACT - 3'  |
|                    | Reverse          | 5' - TCCCACTCAAATGATGACA - 3'   |
| HMGCR              | Forward          | 5' - TGTCCCCACTATGACTCCC - 3'   |
|                    | Reverse          | 5' - TCGGTGGCCTCTAGTGAGAT - 3'  |
| FDFT1              | Forward          | 5' - GCAAATGTCGGCAATCACT - 3'   |
|                    | Reverse          | 5' - GGTTTCATGGAGAGCAAGGAG - 3' |
| PGGT1B             | Forward          | 5' - AGCCTTTGATGGATTGAACG - 3'  |
|                    | Reverse          | 5' - GGTCCTTCCCACAGAAGACA - 3'  |
| RABGGTB            | Forward          | 5' - AGGACCCACCATGAGTAGCA - 3'  |
|                    | Reverse          | 5' - TTTACTTGGCTGGTGGCTTT - 3'  |
| MAP1LC3A<br>(LC3A) | Forward          | 5' - ATGATCACCGGGATTTTGC - 3'   |
|                    | Reverse          | 5' - CTCAGACCGCCTTTCAA - 3'     |
| MAP1LC3B<br>(LC3B) | Forward          | 5' - GAGAAGACCTCAAGCAGCG - 3'   |
|                    | Reverse          | 5' - AAGCTGCTTCTACCCTTGT - 3'   |

**Supplemental Table 2. GSEA enrichment of KEGG functional pathways in lovastatin-regulated genes**

|                                        | NAME                                              | NOM<br>p-val | FDR<br>q-val |
|----------------------------------------|---------------------------------------------------|--------------|--------------|
| <b>SKOV3 Down-regulated by statin</b>  | KEGG_DNA_REPLICATION                              | 0.000        | 0.000        |
|                                        | KEGG_HOMOLOGOUS_RECOMBINATION                     | 0.001        | 0.002        |
|                                        | KEGG_MISMATCH_REPAIR                              | 0.000        | 0.003        |
|                                        | KEGG_BETA_ALANINE_METABOLISM                      | 0.002        | 0.002        |
|                                        | KEGG_NUCLEOTIDE_EXCISION_REPAIR                   | 0.000        | 0.014        |
|                                        | KEGG_CELL_CYCLE                                   | 0.000        | 0.012        |
|                                        | KEGG_RNA_POLYMERASE                               | 0.000        | 0.011        |
|                                        | KEGG_BASE_EXCISION_REPAIR                         | 0.000        | 0.027        |
|                                        | KEGG_SPLICEOSOME                                  | 0.000        | 0.024        |
|                                        | KEGG_BUTANOATE_METABOLISM                         | 0.024        | 0.066        |
|                                        | KEGG_LYSINE_DEGRADATION                           | 0.004        | 0.075        |
|                                        | KEGG_PROGESTERONE_MEDIATED_OOCYTE_MATURATION      | 0.001        | 0.083        |
|                                        | KEGG_PROTEASOME                                   | 0.003        | 0.080        |
|                                        | KEGG_PYRIMIDINE_METABOLISM                        | 0.000        | 0.076        |
|                                        | KEGG_RIBOSOME                                     | 0.000        | 0.074        |
|                                        | KEGG_PENTOSE_AND_GLUCURONATE_INTERCONVERSIONS     | 0.133        | 0.093        |
|                                        | KEGG_RNA_DEGRADATION                              | 0.006        | 0.091        |
| KEGG_ONE_CARBON_POOL_BY_FOLATE         | 0.147                                             | 0.091        |              |
| <b>SKOV3 Up-regulated by statin</b>    | KEGG_TYPE_I_DIABETES_MELLITUS                     | 0.000        | 0.006        |
|                                        | KEGG_GRAFT_VERSUS_HOST_DISEASE                    | 0.001        | 0.012        |
|                                        | KEGG_ALLOGRAFT_REJECTION                          | 0.000        | 0.013        |
|                                        | KEGG_AUTOIMMUNE_THYROID_DISEASE                   | 0.002        | 0.036        |
|                                        | KEGG_GLYCOSAMINOGLYCAN_DEGRADATION                | 0.013        | 0.037        |
|                                        | KEGG_STEROID_BIOSYNTHESIS                         | 0.032        | 0.054        |
|                                        | KEGG_COMPLEMENT_AND_COAGULATION_CASCADES          | 0.003        | 0.047        |
|                                        | KEGG_PRION_DISEASES                               | 0.006        | 0.055        |
|                                        | KEGG_SNARE_INTERACTIONS_IN_VESICULAR_TRANSPORT    | 0.001        | 0.075        |
|                                        | KEGG_LEISHMANIA_INFECTION                         | 0.001        | 0.071        |
| KEGG_PPAR_SIGNALING_PATHWAY            | 0.000                                             | 0.087        |              |
| <b>OVCAR5 Down-regulated by statin</b> | KEGG_DNA_REPLICATION                              | 0.000        | 0.000        |
|                                        | KEGG_MISMATCH_REPAIR                              | 0.000        | 0.003        |
|                                        | KEGG_NUCLEOTIDE_EXCISION_REPAIR                   | 0.000        | 0.015        |
|                                        | KEGG_RNA_POLYMERASE                               | 0.000        | 0.032        |
|                                        | KEGG_HOMOLOGOUS_RECOMBINATION                     | 0.007        | 0.037        |
|                                        | KEGG_SPLICEOSOME                                  | 0.000        | 0.065        |
|                                        | KEGG_PRIMARY_IMMUNODEFICIENCY                     | 0.108        | 0.074        |
| KEGG_PYRIMIDINE_METABOLISM             | 0.000                                             | 0.086        |              |
| <b>OVCAR5 Up-regulated by statin</b>   | KEGG_STEROID_HORMONE_BIOSYNTHESIS                 | 0.000        | 0.007        |
|                                        | KEGG_METABOLISM_OF_XENOBIOTICS_BY_CYTOCHROME_P450 | 0.000        | 0.013        |

**Supplemental Table 3. Lovastatin affects expression of genes in glycolysis/gluconeogenesis pathway**

| ENTREZ_ID | Gene  | OVCAR5        |         | SKOV3         |         | response* |
|-----------|-------|---------------|---------|---------------|---------|-----------|
|           |       | logFoldChange | p.value | logFoldChange | p.value |           |
| 2026      | ENO2  | 1.9267        | 0       | 1.4865        | 0       | both      |
| 2027      | ENO3  | 1.1383        | 0.0194  | 0.9641        | 0.0008  | both      |
| 80201     | HKDC1 | 1.7182        | 0.0001  | 1.6554        | 0       | both      |
| 5091      | PC    | 1.1696        | 0.0003  | 1.9366        | 0       | both      |
| 226       | ALDOA | 0.6283        | 0.0048  | 0.2271        | 0.2522  | one       |
| 330       | ALDOC | 0.4542        | 0.0339  | 0.3062        | 0.1835  | one       |
| 3098      | HK1   | 0.4674        | 0.0266  | 0.4603        | 0.0953  | one       |
| 5211      | PFKL  | 0.4437        | 0.0146  | 0.3666        | 0.1233  | one       |
| 5223      | PGAM1 | 0.1744        | 0.2073  | -1.2398       | 0.0001  | one       |
| 5315      | PKM2  | 0.462         | 0.1192  | 0.5363        | 0.0444  | one       |
| 441531    | PGAM4 | 0.2375        | 0.1484  | -0.9539       | 0.0006  | one       |
| 5106      | PCK2  | 0.2958        | 0.2338  | 2.7429        | 0       | one       |
| 669       | BPGM  | -0.3534       | 0.1686  | -0.0821       | 0.6739  | none      |
| 2023      | ENO1  | 0.1332        | 0.3068  | 0.1565        | 0.422   | none      |
| 2597      | GAPDH | 0.1943        | 0.1922  | 0.1883        | 0.3414  | none      |
| 2821      | GPI   | 0.2281        | 0.1215  | -0.1703       | 0.408   | none      |
| 5213      | PFKM  | -0.4035       | 0.0799  | -0.4633       | 0.0611  | none      |
| 5214      | PFKP  | 0.2286        | 0.1124  | 0.2107        | 0.2775  | none      |
| 5230      | PGK1  | 0.2514        | 0.0867  | -0.1955       | 0.319   | none      |
| 5313      | PKLR  | -0.2264       | 0.1972  | -0.0693       | 0.7767  | none      |
| 7167      | TPI1  | 0.1554        | 0.2594  | -0.3547       | 0.0871  | none      |
| 83440     | ADPGK | -0.2227       | 0.1529  | -0.2949       | 0.1832  | none      |
| 3099      | HK2   | -0.3752       | 0.0234  | 1.7229        | 0       | other#    |

\*Gene expression response in both, one, or none of the cell lines examined.

#Other indicates the response is different in each cell line.

**A**

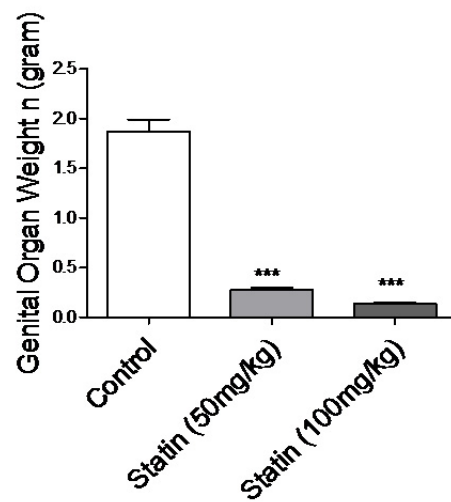

**B**

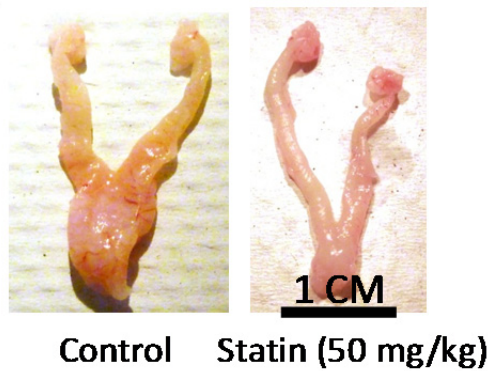

**Supplemental Fig. 1. Daily administration of lovastatin prevents tumor growth in mogp-TAg transgenic mice.**

A. Weight of gynecological tracts taken from mogp-TAg mice treated with lovastatin (50 mg/Kg, 100 mg/Kg) or vehicle (n=10 for each group; \*\*\*p< 0.001, two-tailed Mann-Whitney U test). B. Representative images of gynecological tracts from a mogp-TAg mouse treated daily with lovastatin (50 mg/Kg) and a mogp-TAg mouse treated daily with control vehicle.

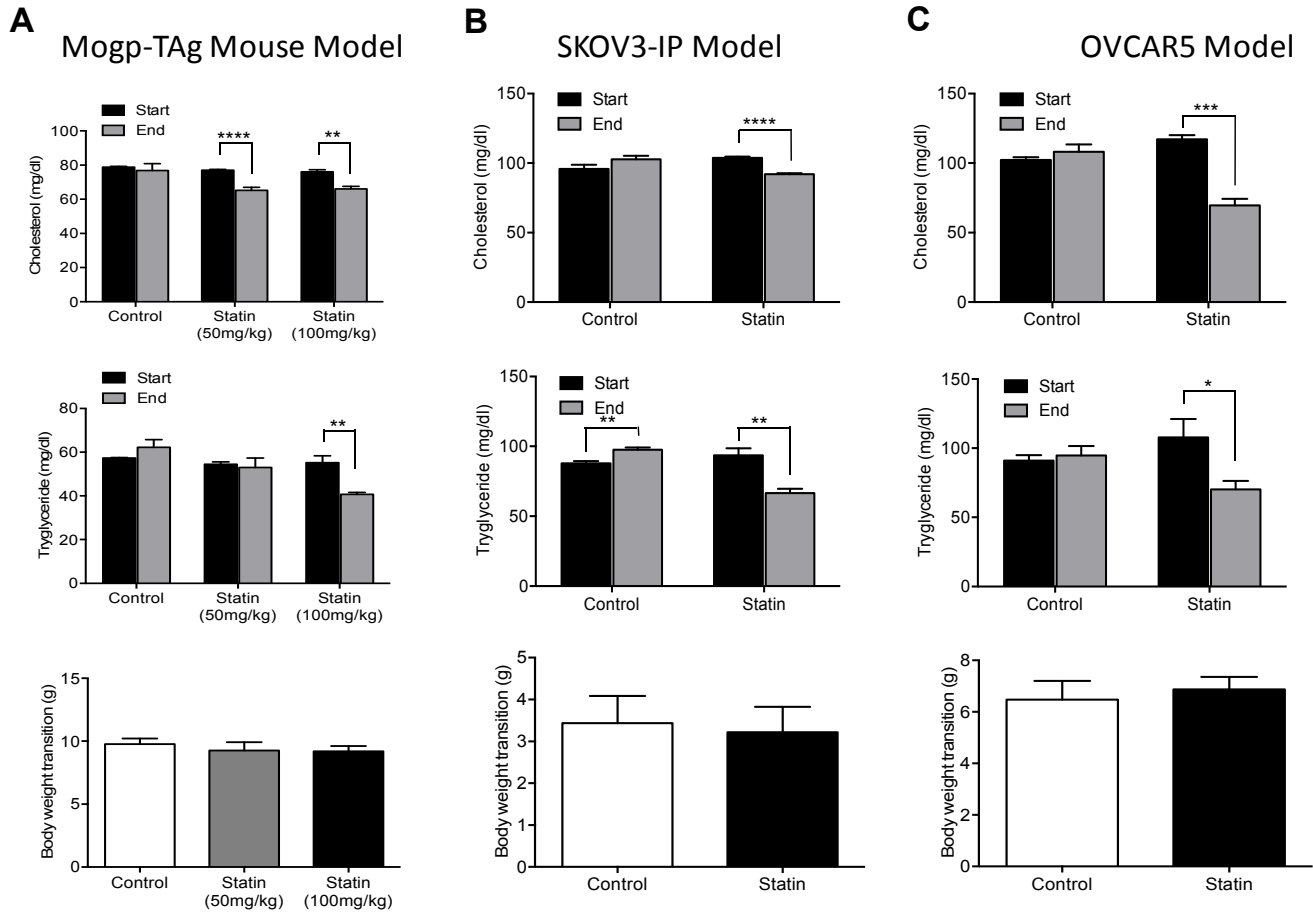

**Supplemental Fig. 2. Body weight and serum levels of cholesterol and triglyceride in mogp-TAg, SKOV3-IP, and OVCAR5 mouse tumor models.** (A) Oral administration of 50 or 100 mg/Kg lovastatin in the mogp-TAg mice reduced serum levels of cholesterol but did not affect body weight. High oral dose of lovastatin, 100 mg/Kg, affects triglycerides levels. (B) & (C) i.p. administration of lovastatin at 12.5 mg/Kg dose reduced cholesterol and triglyceride levels in the SKOV3-IP and OVCAR5 mouse models. Lovastatin did not affect mouse body weight at this dose. \* $p < 0.05$ , \*\* $p < 0.01$ , \*\*\* $p < 0.001$ , \*\*\*\* $p < 0.0001$ , two-tailed Mann-Whitney U test.

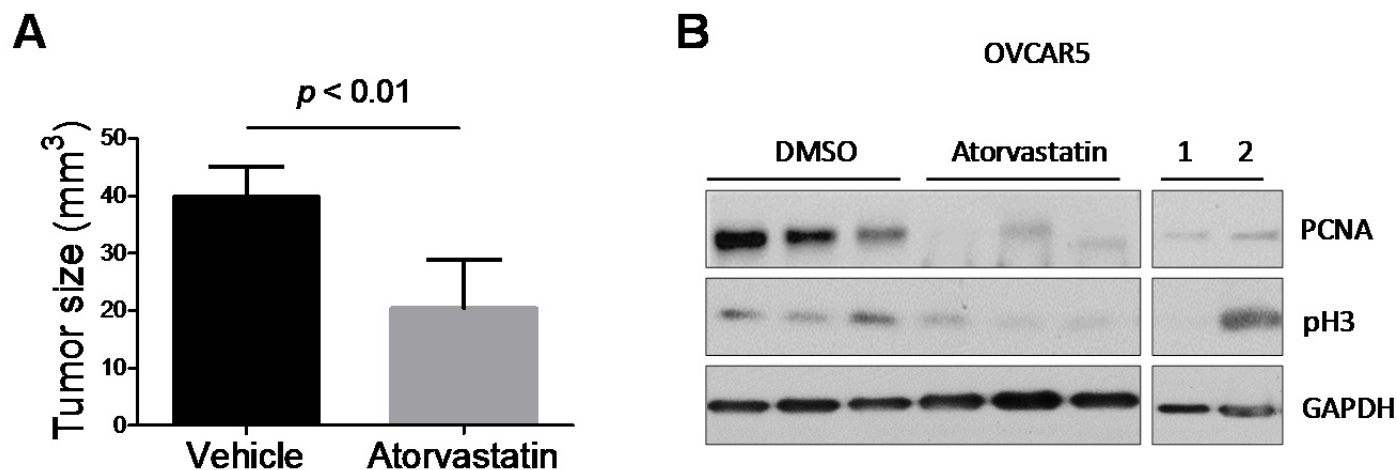

**Supplemental Fig. 3. Atorvastatin treatment delays growth of ovarian tumor xenografts.**

**A.** Tumor sizes in athymic nude mice inoculated with 5 million OVCAR5 ovarian cancer cells that received atorvastatin (daily 10 mg/Kg; i.p. administration) beginning at day 7. Mice were sacrificed at day 28 to measure tumor size. n=5 for each group; two-tailed Mann-Whitney U test.

**B.** Western blot analyses show decreased expression of PCNA in three representative treated tumors as compared to control tumors. Similarly, expression of phospho-Histone H3 is reduced in the atorvastatin-treated group. GAPDH was used as the loading control. Each lane represents a different xenograft tumor sample. 1 and 2 represent OVCAR5 cell cultures treated with DMSO and nocodazole (1  $\mu$ g/ml for 12 h), respectively, to serve as controls.

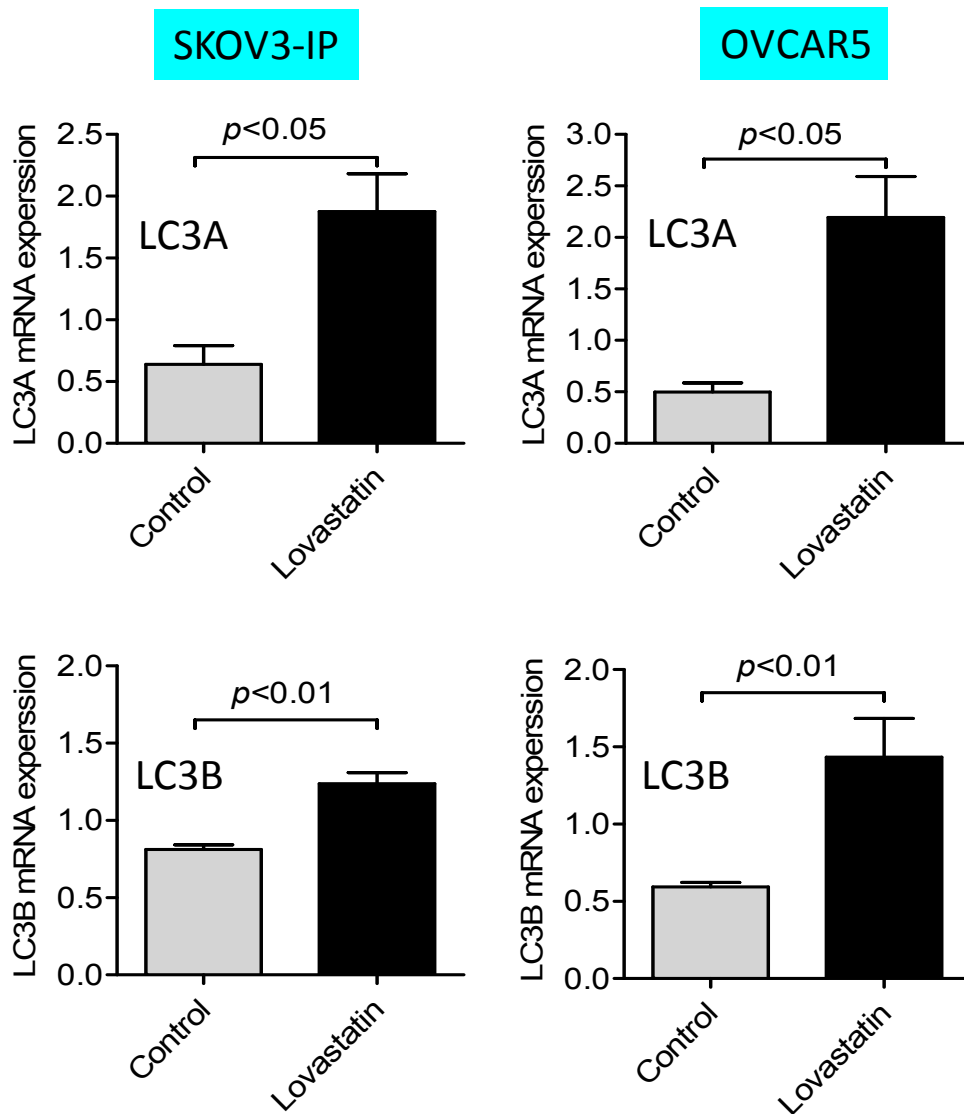

**Supplemental Fig. 4. Statin treatment increases transcript levels of LC3A and LC3B.** To determine transcript expression levels of LC3A and LC3B, qRT-PCR was performed on SKOV3-IP and OVCAR5 xenograft tumors obtained from lovastatin or vehicle-treated mice.  $n=5$  for each group, two-tailed Mann-Whitney U test.

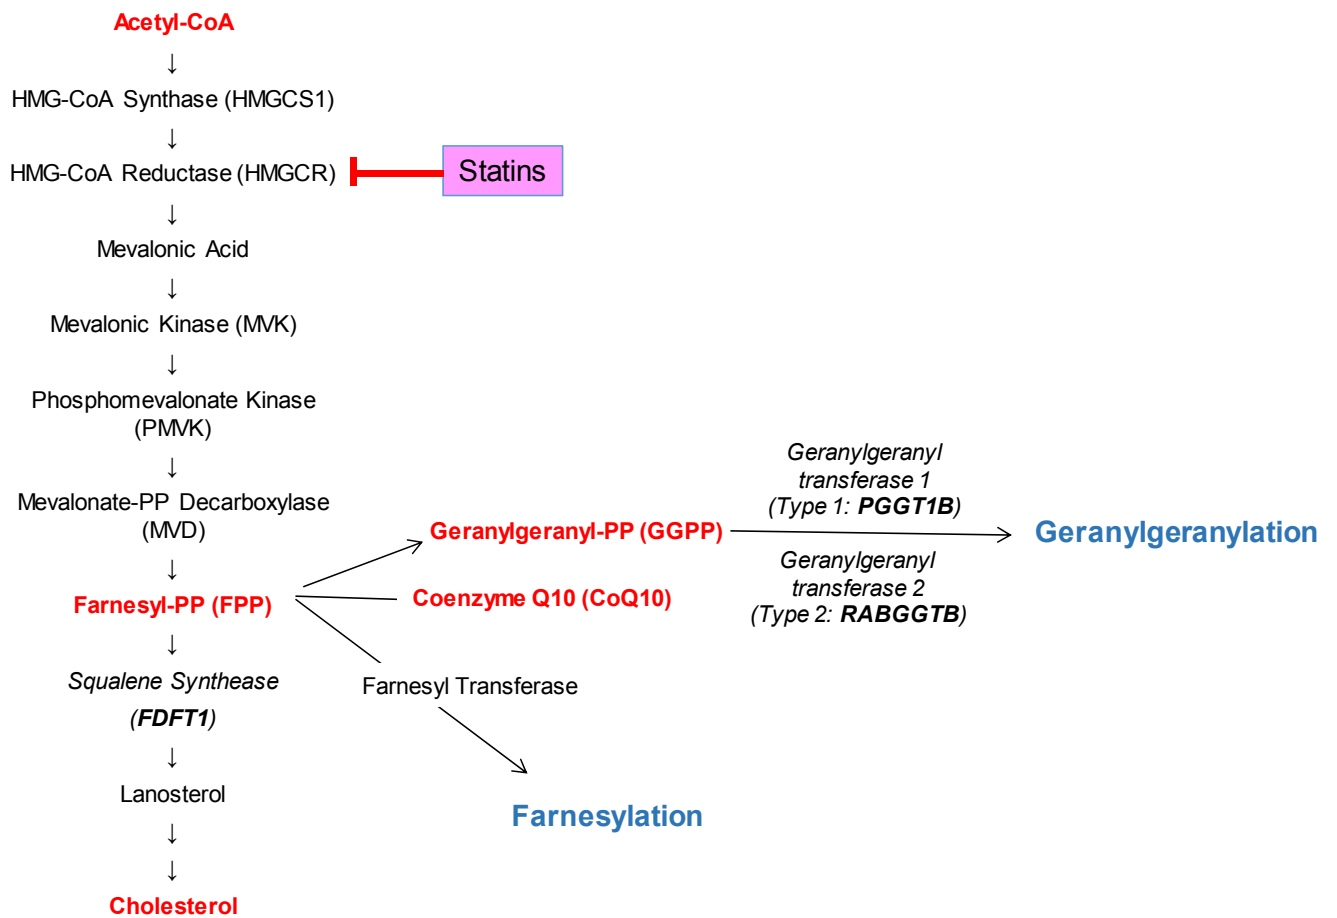

**Supplemental Fig 5. Scheme of the mevalonate pathway.** Intermediate metabolites are shown in red, enzymes in the pathway are shown in black, genes encoding enzymes targeted by RNAi in this study are shown in italics. The rate-limiting step of this pathway is catalyzed by HMG-CoA reductase, which can be inhibited by statins.



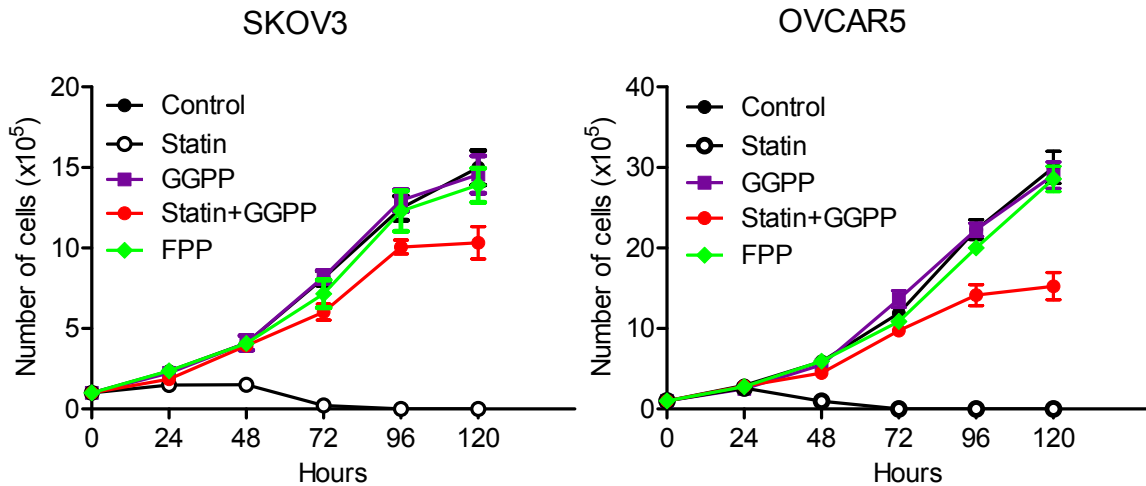

**Supplemental Fig. 6. Applying GGPP or FPP as a single agent does not affect ovarian cancer cell proliferation.** Cells were incubated with GGPP (25  $\mu$ M), FPP (25  $\mu$ M), lovastatin (10  $\mu$ M), DMSO (vehicle control), or a combination of GGPP or FPP with lovastatin. Numbers of cells were measured every 24 h over a 120 h period. Data are presented as the mean  $\pm$  SD (n=3).

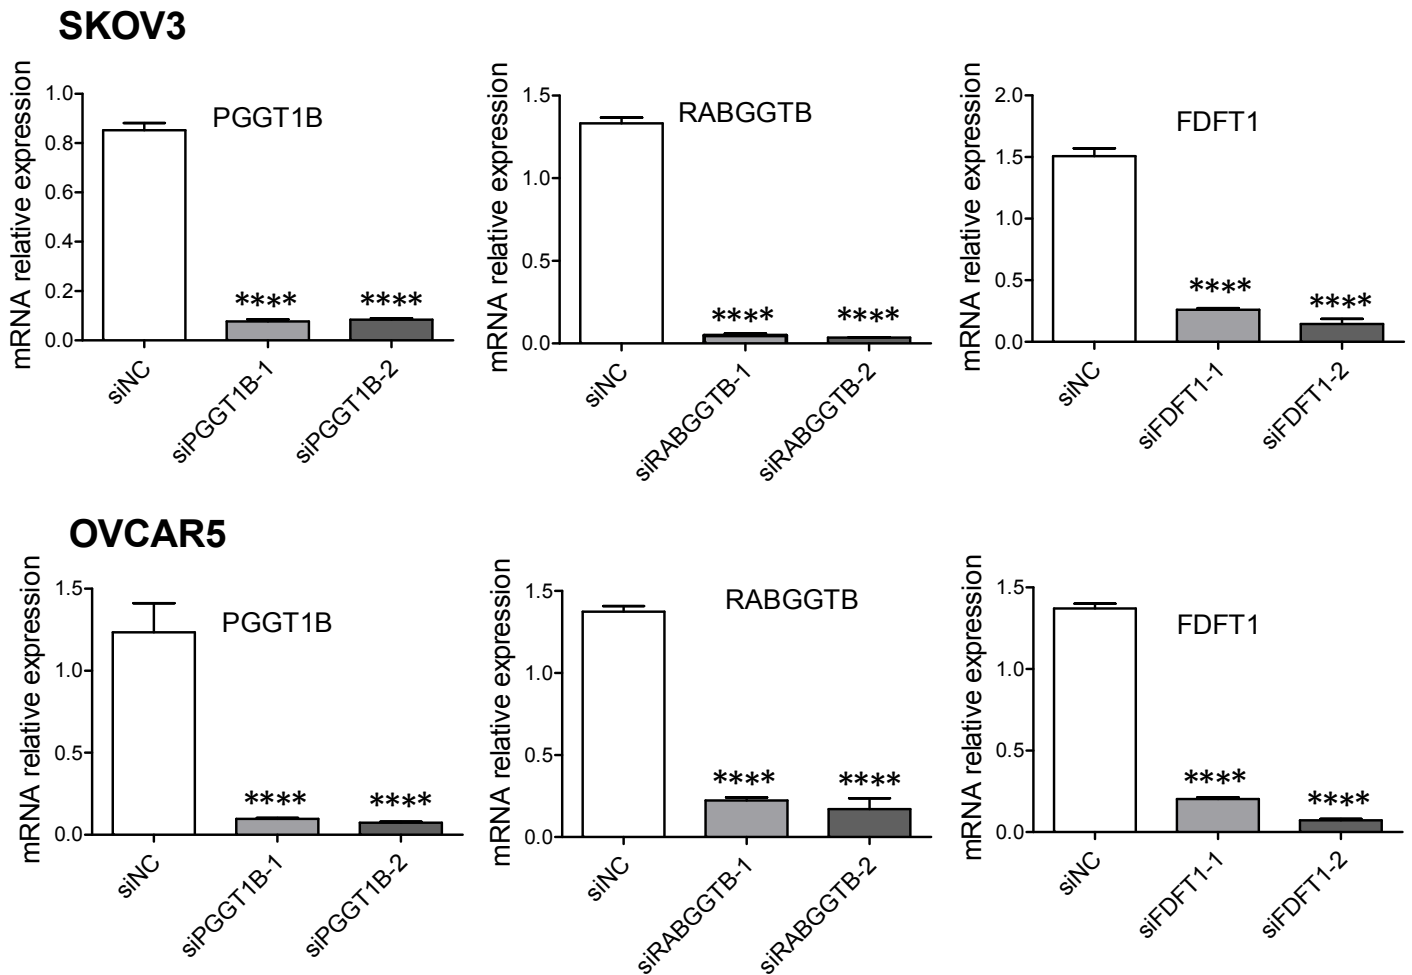

**Supplemental Fig. 7. Real-time qRT-PCR confirms knockdown efficiency of each siRNA.**

The knockdown efficiency of each siRNA for the designated enzyme in the mevalonate pathway was analyzed by qRT-PCR. Non-targeting siRNA was used as a control. All values were normalized to expression of  $\beta$ -actin (ACTB), a housekeeping gene. \*\*\*\*  $p < 0.0001$
